# Supplementary material for: A Randomized Phase II Study of Coexpression Extrapolation (COXEN) with Neoadjuvant Chemotherapy for Bladder Cancer (SWOG S1314; NCT02177695)
Source: Oxford University Press journal article supplement (doi:10.1158/1078-0432.ccr-20-2409), 2021-02-10
Supplement: 10780432ccr202409-sup-245726_4_supp_6854402_qn53cx.docx [file 10780432ccr202409-sup-245726_4_supp_6854402_qn53cx.docx]

Supplemental Table 1. Calculation of individual drug scores for COXEN

| Met.bm | Met.coef | Vbl.bm | Vbl.coef | Adr.bm | Adr.coef | Cis.bm | Cis.coef |
| --- | --- | --- | --- | --- | --- | --- | --- |
| intercept | 0.588484 | intercept | -3.90681 | intercept | -1.61091 | intercept | 2.758824 |
| 221544_s_at | -0.0786 | 201243_s_at | 0.028988 | 209993_at | 0.004639 | 204019_s_at | 0.012632 |
| 216979_at | 0.031839 | 210652_s_at | 0.060823 | 209994_s_at | -0.00312 | 212338_at | 0.039684 |
| 202831_at | 0.02569 | 213666_at | -0.03358 | 207558_s_at | -0.06859 | 210822_at | 0.019383 |
| 208352_x_at | -0.00536 | 201242_s_at | 0.020263 | 209484_s_at | 0.016239 | 203256_at | -0.02919 |
| 219919_s_at | 0.269171 | 214298_x_at | -0.04195 | 218228_s_at | 0.004598 | 210642_at | 0.11614 |
| 218904_s_at | -0.1344 | 212414_s_at | -0.04699 | 203919_at | 0.0557 | 202931_x_at | -0.01412 |
| 222288_at | 0.177238 | 204236_at | -0.05139 | 202671_s_at | 0.032882 | 209462_at | -0.00096 |
| 219456_s_at | 0.16332 | 208949_s_at | -0.00026 | 221825_at | 0.000583 | 219010_at | -0.03448 |
| 202759_s_at | 0.066617 | 212413_at | -0.04033 | 206387_at | 0.060586 | 214439_x_at | -0.05363 |
| 218960_at | 0.065391 | 204089_x_at | -0.09104 | 210004_at | -0.01229 | 210201_x_at | -0.04372 |
| 204595_s_at | 0.137094 | 212312_at | -0.03206 | 208617_s_at | 0.06191 | 216271_x_at | 0.010182 |
| 220416_at | -0.11156 | 201131_s_at | 0.032546 | 209904_at | 0.073563 | 212418_at | 0.021702 |
| 206818_s_at | 0.127079 | 214433_s_at | 0.061684 | 216590_at | -0.06182 | 31874_at | 0.046729 |
| 207200_at | 0.0711 | 214091_s_at | 0.007347 | 220294_at | -0.00095 | 203581_at | 0.091013 |
| 201234_at | 0.274683 | 204639_at | -0.05982 | 203787_at | -0.04787 | 210202_s_at | -0.05395 |
| 220220_at | -0.16479 | 218693_at | 0.019298 | 206109_at | 0.03104 | 214755_at | 0.019997 |
| 205578_at | -0.04904 | 78383_at | -0.03365 | 202911_at | -0.05497 | 212543_at | -0.00229 |
| 216573_at | 0.039001 | 201341_at | 0.002579 | 201743_at | -0.06346 | 217744_s_at | 0.008282 |
| 204043_at | 0.188609 | 206665_s_at | 0.025106 | 213555_at | -0.03273 | 217939_s_at | -0.01862 |
| 206276_at | 0.160401 | 203824_at | 0.03599 | 210829_s_at | -0.06094 | 215243_s_at | 0.029424 |
|  |  | 201596_x_at | 0.013814 | 218534_s_at | -0.06462 | 215623_x_at | -0.01054 |
|  |  | 221979_at | -0.04337 | 222202_at | 0.01776 | 212962_at | -0.02205 |
|  |  | 219573_at | 0.039361 | 201067_at | -0.04246 | 204989_s_at | -0.01186 |
|  |  | 201302_at | 0.005673 | 208788_at | -0.06924 | 202826_at | 0.040519 |
|  |  | 209498_at | 0.032811 | 216525_x_at | 0.0342 | 213349_at | -0.00243 |
|  |  | 209212_s_at | -0.00289 | 205778_at | -0.03102 | 205847_at | 0.001474 |
|  |  | 204228_at | -0.02897 | 221794_at | 0.060784 | 206963_s_at | 0.042638 |
|  |  | 217744_s_at | 0.020526 | 216843_x_at | 0.044496 | 216789_at | 0.019019 |
|  |  | 203267_s_at | 0.016841 | 207121_s_at | -0.00203 | 211778_s_at | 0.010508 |
|  |  | 203343_at | 0.021331 | 205531_s_at | 0.006288 | 200668_s_at | 0.044656 |
|  |  | 209008_x_at | 0.004607 | 208776_at | 0.009163 | 212508_at | 0.061513 |
|  |  | 205885_s_at | -0.03652 | 221003_s_at | 0.01875 | 44702_at | -0.01301 |
|  |  | 209211_at | 3.13E-05 | 218585_s_at | -0.02103 | 214643_x_at | -0.02075 |
|  |  | 218370_s_at | -0.03284 | 201891_s_at | -0.02342 | 221027_s_at | -0.04372 |
|  |  | 216199_s_at | -0.09751 | 207525_s_at | 0.065662 | 206661_at | 0.007409 |
|  |  | 203298_s_at | -0.01989 | 217485_x_at | 0.029062 |  |  |
|  |  | 221656_s_at | 0.035062 | 221610_s_at | 0.035018 |  |  |
|  |  | 203953_s_at | 0.035063 | 206855_s_at | -0.05286 |  |  |
|  |  | 215037_s_at | 0.025114 | 55872_at | 0.064928 |  |  |
|  |  | 213848_at | -0.05267 | 205490_x_at | 0.0316 |  |  |
|  |  | 201411_s_at | 0.005161 |  |  |  |  |
|  |  | 210835_s_at | 0.030095 |  |  |  |  |
|  |  | 219508_at | 0.011868 |  |  |  |  |
|  |  | 218035_s_at | 0.005943 |  |  |  |  |
|  |  | 215807_s_at | 0.018076 |  |  |  |  |
|  |  | 217936_at | 0.04907 |  |  |  |  |
|  |  | 211026_s_at | -0.02512 |  |  |  |  |
|  |  | 212444_at | -0.00713 |  |  |  |  |
|  |  | 221125_s_at | 0.014791 |  |  |  |  |
|  |  | 212967_x_at | -0.02785 |  |  |  |  |
|  |  | 209238_at | 0.023373 |  |  |  |  |
|  |  | 203557_s_at | 0.039803 |  |  |  |  |
|  |  | 209641_s_at | -0.0161 |  |  |  |  |
|  |  | 209163_at | 0.020478 |  |  |  |  |
|  |  | 201301_s_at | 0.002243 |  |  |  |  |
|  |  | 203108_at | -0.00674 |  |  |  |  |
|  |  | 209164_s_at | 0.015379 |  |  |  |  |
|  |  | 220189_s_at | 0.000665 |  |  |  |  |
|  |  | 208161_s_at | -0.02043 |  |  |  |  |
|  |  | 201340_s_at | -0.00508 |  |  |  |  |
