# Supplementary material for: A Randomized Phase II Study of Coexpression Extrapolation (COXEN) with Neoadjuvant Chemotherapy for Bladder Cancer (SWOG S1314; NCT02177695)
Source: Oxford University Press journal article supplement (doi:10.1158/1078-0432.ccr-20-2409), 2021-02-10
Supplement: 10780432ccr202409-sup-245726_4_supp_6854403_qn53cx.docx [file 10780432ccr202409-sup-245726_4_supp_6854403_qn53cx.docx]

Supplemental Table 2. Comparing GC and DDMVAC for Pathologic Response at Cystectomy – intention to treat analysis

| **Pathologic Response** | **GC** | **ddMVAC** |
| --- | --- | --- |
| pT0 | 34 (30%) | 31 (28%) |
| <pT1, but not pT0 | 12 (10%) | 22 (19%) |
| Non-responders | 69 (60%) | 59 (53%) |
| Total | 115 (100%) | 112 (100%) |
